# Supplementary material for: Transcript profile analysis reveals important roles of jasmonic acid signalling pathway in the response of sweet potato to salt stress
Source: PubMed Central journal article supplement (PMC5234020; doi:10.1038/srep40819), 2017-01-13
Supplement: srep40819-s5.pdf [file srep40819-s5.pdf]

# **Transcript profile analysis reveals important roles of jasmonic acid signalling pathway in the response of sweet potato to salt stress**

Huan Zhang<sup>1</sup>, Qian Zhang<sup>1</sup>, Hong Zhai<sup>1</sup>, Yan Li<sup>1</sup>, Xiangfeng Wang<sup>1</sup>, Qingchang Liu<sup>1,\*</sup>  
& Shaozhen He<sup>1,\*</sup>

<sup>1</sup>Beijing Key Laboratory of Crop Genetic Improvement/Laboratory of Crop Heterosis and Utilization, Ministry of Education, China Agricultural University, Beijing 100193, China

\*Correspondence and requests for materials should be addressed to S. H. (email: sunnynba@cau.edu.cn) and Q. L. (liuqc@cau.edu.cn)

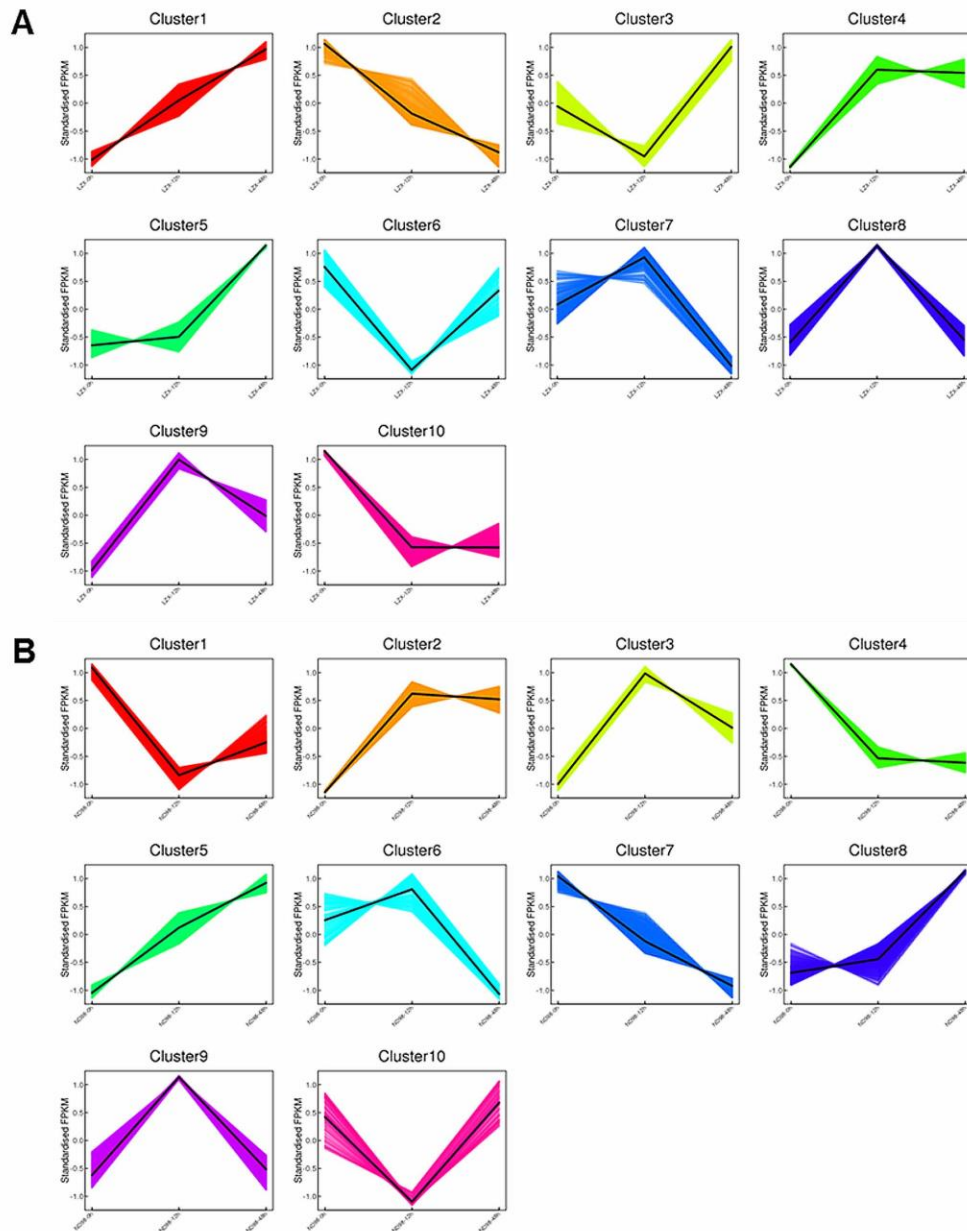

**Supplementary Fig. S1. DEG cluster analysis based on the K-means method.** The DEGs were divided into 10 categories in Lizixiang (A) and ND98 (B), respectively, according to their expression patterns.

**Supplementary Table S1.** Length distribution of the assembled transcripts and unigenes.

| Nucleotide length (bp) | Transcript      | Unigene         |
|------------------------|-----------------|-----------------|
| 200-300                | 18,462 (8.01%)  | 5,871 (9.22%)   |
| 300-500                | 43,511 (18.89%) | 22,030 (34.60%) |
| 500-1000               | 56,596 (24.57%) | 17017 (26.73%)  |
| 1000-2000              | 65,110 (25.32%) | 11,319 (17.78%) |
| 2000+                  | 46,678 (20.26%) | 7,436 (11.68%)  |
| Total number           | 230,357         | 63,673          |
| Total length           | 299,012,560     | 60,713,683      |
| Mean length            | 1298.04         | 953.52          |

**Supplementary Table S2.** Statistics of annotated gene information from various databases.

| Annotated databases                | Unigene | ≥ 300 nt | ≥ 1000 nt |
|------------------------------------|---------|----------|-----------|
| Annotated in COG                   | 10,351  | 9,223    | 6,121     |
| Annotated in GO                    | 18,685  | 15,883   | 8,966     |
| Annotated in KEGG                  | 12,240  | 10,488   | 6,003     |
| Annotated in KOG                   | 20,059  | 17,259   | 10,043    |
| Annotated in Pfam                  | 24,666  | 22,168   | 13,946    |
| Annotated in Swiss-Prot            | 22,764  | 19,984   | 11,819    |
| Annotated in TrEMBL                | 34,086  | 29,343   | 16,335    |
| Annotated in Nr                    | 34,689  | 29,676   | 16,373    |
| Annotated in Nt                    | 20,746  | 18,273   | 12,022    |
| Annotated in at least one database | 37,016  | 31,145   | 16,623    |

**Supplementary Table S3.** The up-regulated, down-regulated and neutral genes in Lizixiang and ND98, respectively. (Supplementary Dataset 1)

**Supplementary Table S4.** DEGs were higher in ND98 than in Lizixiang for at least one time point during salt treatment. (Supplementary Dataset 2)

**Supplementary Table S5.** DNA methylation- and demethylation-related genes identified via gene expression profiling. (Supplementary Dataset 3)

**Supplementary Table S6.** Key genes involved in DNA demethylation and methylation, JA, ABA

and SA biosynthesis and signalling, stomatal opening and closure and ion transport.

| Gene                                                     | ID               | FPKM-LZX.0h | FPKM-LZX.12h | FPKM-LZX.48h | FPKM-ND98.0h | FPKM-ND98.12h | FPKM-ND98.48h |
|----------------------------------------------------------|------------------|-------------|--------------|--------------|--------------|---------------|---------------|
| <b>The DNA demethylation-related genes</b>               |                  |             |              |              |              |               |               |
| <i>IbROS1</i>                                            | c144343.graph_c0 | 2.925       | 1.185        | 1.395        | 2.860        | 6.190         | 1.820         |
| <i>IbDML3</i>                                            | c148603.graph_c0 | 26.655      | 16.360       | 14.315       | 58.440       | 45.285        | 24.545        |
| <b>The DNA methylation-related genes</b>                 |                  |             |              |              |              |               |               |
| <i>IbCMT2</i>                                            | c124784.graph_c0 | 4.825       | 4.650        | 3.805        | 3.575        | 5.015         | 2.050         |
| <i>IbDRM1</i>                                            | c136099.graph_c0 | 18.515      | 6.850        | 11.230       | 14.860       | 7.415         | 10.920        |
| <i>IbDRM2</i>                                            | c156316.graph_c1 | 49.305      | 33.700       | 27.995       | 42.160       | 44.825        | 44.460        |
| <i>IbMET1</i>                                            | c154661.graph_c0 | 8.433       | 6.985        | 6.697        | 5.720        | 10.104        | 11.978        |
| <b>The JA biosynthesis and signalling-related genes</b>  |                  |             |              |              |              |               |               |
| <i>IbLOX</i>                                             | c154376.graph_c0 | 75.637      | 184.720      | 130.424      | 148.027      | 298.626       | 103.040       |
| <i>IbAOS</i>                                             | c110075.graph_c0 | 2.476       | 0.389        | 0.000        | 5.853        | 13.274        | 2.309         |
| <i>IbAOC</i>                                             | c136730.graph_c0 | 2.989       | 4.796        | 7.071        | 7.091        | 8.394         | 9.872         |
| <i>IbOPR3</i>                                            | c151632.graph_c0 | 10.287      | 12.939       | 10.313       | 4.943        | 83.780        | 18.896        |
| <i>IbCOI1</i>                                            | c148337.graph_c2 | 28.498      | 8.007        | 6.102        | 16.811       | 14.038        | 61.087        |
| <i>IbPDF1.2</i>                                          | c136835.graph_c0 | 128.199     | 171.131      | 116.517      | 493.801      | 335.206       | 122.939       |
| <i>IbMYC2</i>                                            | c143913.graph_c2 | 51.772      | 22.515       | 13.868       | 12.617       | 11.600        | 14.959        |
| <b>The ABA biosynthesis and signalling-related genes</b> |                  |             |              |              |              |               |               |
| <i>IbZEP</i>                                             | c158900.graph_c0 | 12.184      | 7.554        | 4.333        | 26.565       | 6.384         | 3.171         |
| <i>IbAO</i>                                              | c150446.graph_c0 | 2.290       | 1.811        | 1.086        | 5.547        | 1.617         | 0.680         |
| <i>IbNCED</i>                                            | c156411.graph_c0 | 15.977      | 25.232       | 43.713       | 364.130      | 47.737        | 40.918        |
| <i>IbSnRK2</i>                                           | c148195.graph_c0 | 31.011      | 165.411      | 173.425      | 33.339       | 111.176       | 143.886       |
| <i>IbABF1</i>                                            | c125138.graph_c1 | 21.600      | 13.545       | 5.685        | 13.600       | 8.770         | 7.155         |
| <b>The SA biosynthesis and signalling-related genes</b>  |                  |             |              |              |              |               |               |
| <i>IbPAL</i>                                             | c147773.graph_c3 | 90.323      | 15.717       | 13.287       | 435.560      | 21.205        | 16.453        |
| <i>IbNPR1</i>                                            | c151920.graph_c0 | 8.805       | 7.100        | 5.845        | 14.185       | 10.470        | 10.425        |
| <i>IbPRI</i>                                             | c160535.graph_c0 | 0.313       | 7.576        | 5.064        | 0.163        | 3.548         | 7.904         |
| <b>The stomatal opening and closure-related genes</b>    |                  |             |              |              |              |               |               |
| <i>IbRPT2</i>                                            | c158200.graph_c0 | 161.200     | 53.980       | 92.595       | 33.455       | 17.985        | 42.050        |
| <i>IbbHLH93</i>                                          | c152736.graph_c0 | 27.455      | 4.165        | 2.100        | 3.945        | 8.060         | 4.320         |
| <b>The ion transport-related genes</b>                   |                  |             |              |              |              |               |               |
| <i>IbHKT1</i>                                            | c158185.graph_c0 | 24.010      | 3.490        | 4.395        | 19.665       | 36.235        | 55.295        |
| <i>IbNHX1</i>                                            | c151428.graph_c0 | 10.765      | 10.265       | 9.580        | 17.940       | 14.340        | 15.400        |
| <i>IbNHX18</i>                                           | c158340.graph_c0 | 1.030       | 0.000        | 0.025        | 17.075       | 19.380        | 29.665        |

**Supplementary Table S7.** DEGs from different phytohormone signalling pathways.

(Supplementary Dataset 4)

**Supplementary Table S8.** Primers used in this study.

| Primer name                                 | Primer sequence (5'-3') |
|---------------------------------------------|-------------------------|
| Primers for MASP                            |                         |
| <i>EcoRI</i> -adaptor1                      | CTCGTAGA CTGCGTACC      |
| <i>EcoRI</i> -adaptor2                      | AATTGGTACGCA GTC        |
| <i>HpaII/MspI</i> -adaptor1                 | GATCATGAGTCCTGCT        |
| <i>HpaII/MspI</i> -adaptor2                 | CGAGCA GGA CT CAT GA    |
| <i>EcoRI</i> -pre-amplification primer      | GACTGCGTACCAATTCA       |
| <i>HpaII/MspI</i> -pre-amplification primer | ATCATGAGTCCTGCTCGG      |
| <i>EcoRI</i> -AAC                           | GACTGCGTACCAATTCAAC     |
| <i>EcoRI</i> -AAG                           | GACTGCGTACCAATTCAAG     |
| <i>EcoRI</i> -ACA                           | GACTGCGTACCAATTCACA     |
| <i>EcoRI</i> -ACT                           | GACTGCGTACCAATTCACT     |
| <i>EcoRI</i> -ACC                           | GACTGCGTACCAATTCACC     |
| <i>EcoRI</i> -ACG                           | GACTGCGTACCAATTCACG     |
| <i>EcoRI</i> -AGC                           | GACTGCGTACCAATTCAGC     |
| <i>EcoRI</i> -AGG                           | GACTGCGTACCAATTCAGG     |
| <i>HpaII/MspI</i> -TCT                      | ATCATGAGTCCTGCTCGGTCT   |
| <i>HpaII/MspI</i> -TCG                      | ATCATGAGTCCTGCTCGGTCTG  |
| <i>HpaII/MspI</i> -TCC                      | ATCATGAGTCCTGCTCGGTCTC  |
| <i>HpaII/MspI</i> -TTC                      | ATCATGAGTCCTGCTCGGTCTC  |



|                        |                       |
|------------------------|-----------------------|
| <i>HpaII/MspI</i> -TTG | ATCATGAGTCCTGCTCGGTTG |
| <i>HpaII/MspI</i> -TTA | ATCATGAGTCCTGCTCGGTTA |
| <i>HpaII/MspI</i> -TGA | ATCATGAGTCCTGCTCGGTGA |
| <i>HpaII/MspI</i> -TGT | ATCATGAGTCCTGCTCGGTGT |

Primers for qRT-PCR

|                    |                               |
|--------------------|-------------------------------|
| $\beta$ -actin-F   | AGCAGCATGAA GATTAAGGTTGTAGCAC |
| $\beta$ -actin-R   | TGGAAAATTAGAAGCA CTCCTGTGAAC  |
| <i>IbROS1</i> -F   | AACACCAGTGGGGAATGTAA GAT      |
| <i>IbROS1</i> -R   | ATGATTGCTGTGTTTTGGA GACT      |
| <i>IbDML3</i> -F   | CACTCTCCTTCTCCTCCGTCC         |
| <i>IbDML3</i> -R   | GAATGGGTTA GTTTCATCGGC        |
| <i>IbLOX</i> -F    | GTGCTGAACAACA CGCTTTTAG       |
| <i>IbLOX</i> -R    | GTTTTAAGGTAGAACTCATTGGGAT     |
| <i>IbAOS</i> -F    | GACGGTTTTTGGACATTCA GG        |
| <i>IbAOS</i> -R    | GAACGAATCCTGGAGGCACT          |
| <i>IbAOC</i> -F    | GACGAGGATTTTGACGAGCA          |
| <i>IbAOC</i> -R    | TGGGATAATACAA GCA GCA GGA     |
| <i>IbOPR3</i> -F   | CGCCATCCATTCCAAGTTTAG         |
| <i>IbOPR3</i> -R   | GGTCCCCATAATACGCTAAC          |
| <i>IbCOII</i> -F   | CGGCA GTTCTGGAATCTCG          |
| <i>IbCOII</i> -R   | TATGCGAGGAGATGGGCTG           |
| <i>IbPDF1.2</i> -F | GGCTTCATCTCTTCGTTCA TTT       |

|                   |                           |
|-------------------|---------------------------|
| <i>IbPDF1.2-R</i> | GCAGTTGCTGTCCCGA GAA      |
| <i>IbMYC2-F</i>   | TTTGCCAGA GAAACCTTATCCA   |
| <i>IbMYC2-R</i>   | GAGGTAAACCCATCGCA GG      |
| <i>IbZEP-F</i>    | TCGGTTTGAA GTGTTTTCTGTG   |
| <i>IbZEP-R</i>    | CAAACCTTCTCCTCAAACAACGAC  |
| <i>IbAO-F</i>     | GTTACTTGCTATTCTCGGGGTG    |
| <i>IbAO-R</i>     | GATGAGTCTTGGCTGGGTTG      |
| <i>IbNCED-F</i>   | TTTGGCTAAAGTGGACCTCTCA    |
| <i>IbNCED-R</i>   | ATTCCTGGGCA GAAAAACG      |
| <i>IbSnRK2-F</i>  | GGTGCCA GTGATAACCCTCTAA   |
| <i>IbSnRK2-R</i>  | CTTGATAGCCACTTTGTGTCCA G  |
| <i>IbABF1-F</i>   | GGAGTTTGGGACA GAAAGGAG    |
| <i>IbABF1-R</i>   | AAGCCCCGA CA GTCA CCT     |
| <i>IbPAL-F</i>    | TCACTGTGGGTGCTAATGGAG     |
| <i>IbPAL-R</i>    | GGCTTGGCGGA GTTCTG        |
| <i>IbNPR1-F</i>   | AGTCCGTTCTTCA GGA GCGT    |
| <i>IbNPR1-R</i>   | TTCCGCAATAAAGGTAA GCC     |
| <i>IbPR1-F</i>    | GCAAGATTACCTAAACCCCCA     |
| <i>IbPR1-R</i>    | GGAGTTGGCGTA GTTCTGCG     |
| <i>IbPRT2-F</i>   | GGGA GTA GTGCGA GTGTGA GG |
| <i>IbRPT2-R</i>   | AAAGGATTCAACTTCCCCAACT    |
| <i>IbbHLH93-F</i> | GAGAAATGAGTCGTGGGAAGG     |

*IbbHLH93-R*

AAAACAAAAGGCGGAGGC

---
